# Supplementary material for: A Novel Inducible Prophage from Burkholderia vietnamiensis G4 Is Widely Distributed across the Species and Has Lytic Activity against Pathogenic Burkholderia
Source: Viruses. 2020 May 31;12(6):601. doi: 10.3390/v12060601 (PMC7354579; doi:10.3390/v12060601)
Supplement: Supplementary file 1 [file viruses-12-00601-s001.zip › viruses_Weiser_et_al_TableS1.xlsx]

## Sheet: Sheet1
Strain characteristics											PHASTER prophage identification
Strain name	Alternative strain name	PRJEB9765 run accession number	NCBI_assembly_reference	Origin	Origin code	Total length (bp)	# contigs	# contigs (>= 1000 bp)	N50 (bp)	GC (%)	Contig	Region	Region length (kb)	Completeness	G4P1/G4P1-like	Origin code	Score	Total proteins	Region position	Most common phage	GC %	intact	questionable	incomplete	Total prophage (Mb)	Lysogen genome (Mb)	prophage (%) in genome
AU1233			GCA_001718775.1	CF Blood	CF	6835067	2	2	5577538	66.86	1	1	18.5	incomplete		CF	40	19	3548283-3566864 info_outline	PHAGE_Rhodof_P26218_NC_029061(6)	0.6291	1	0	2	0.0811	6.83507	1.18653
											1	2	25.4	incomplete			60	33	3843114-3868604 info_outline	PHAGE_Salmon_SEN34_NC_028699(19)	0.6543
											1	3	37.2	intact			150	48	4065046-4102291 info_outline	PHAGE_Burkho_KS9_NC_013055(19)	0.6094
AU15829			GCA_001528495.1	Non CF tumor irradiated	CLIN	7391535	153	141	118424	66.72	14	1	10.4	incomplete		CLIN	40	8	98294-108721 info_outline	PHAGE_Stx2_c_1717_NC_011357(2)	0.6305	0	0	5	0.0499	7.39154	0.675097
											21	2	6.2	incomplete			60	10	1048-7322 info_outline	PHAGE_Stx2_c_1717_NC_011357(2)	0.5939
											94	3	18.4	incomplete			40	9	3707-22168 info_outline	PHAGE_Salmon_g341c_NC_013059(1)	0.6583
											120	4	7.5	incomplete			20	8	12786-20383 info_outline	PHAGE_Burkho_phi6442_NC_009235(2)	0.5613
											124	5	7.4	incomplete			10	11	1499-8986 info_outline	PHAGE_Lister_A118_NC_003216(1)	0.6055
AU21726			GCA_001529585.1	Non-CF Ovarian cyst	CLIN	7052954	108	99	177957	66.97	42	1	33.6	intact		CLIN	150	49	14097-47733 info_outline	PHAGE_Burkho_Bcep176_NC_007497(22)	0.6128	2	0	0	0.0615	7.05295	0.871975
											78	2	27.9	intact			150	35	3143-31053 info_outline	PHAGE_Escher_vB_EcoM_ep3_NC_025430(8)	0.6324
AU25004			GCA_001528525.1	Non-CF Lymph node	CLIN	6883433	105	98	153998	66.95	6	1	31.4	questionable		CLIN	80	37	212325-243726 info_outline	PHAGE_Salmon_SEN34_NC_028699(21)	0.639	1	1	0	0.0437	6.88343	0.634858
											81	2	12.3	intact			110	17	2087-14465 info_outline	PHAGE_Escher_vB_EcoM_ep3_NC_025430(4)	0.6376
AU25340			GCA_001528545.1	CF Sputum	CF	7017870	99	90	175058	66.87	26	1	29.9	intact		CF	150	30	6928-36828 info_outline	PHAGE_Burkho_phi1026b_NC_005284(8)	0.5601	2	0	0	0.0596	7.01787	0.849261
											55	2	29.7	intact			130	39	34232-64006 info_outline	PHAGE_Burkho_Bcep176_NC_007497(19)	0.6179
AU26564			GCA_001528565.1	Non-CF Blood, 2 weeks of bacteremia	CF	6911902	308	269	63922	66.8	90	1	33.4	incomplete		CF	50	19	7788-41207 info_outline	PHAGE_Aeromo_vB_AsaM_56_NC_019527(4)	0.6451	2	1	3	0.152	6.9119	2.19911
											230	2	11.6	incomplete			20	22	313-12007 info_outline	PHAGE_Burkho_phiE125_NC_003309(7)	0.6035
											232	3	28.6	incomplete			40	40	14607-43214 info_outline	PHAGE_Rhodof_P26218_NC_029061(7)	0.6352
											247	4	26.9	intact			150	33	3112-30090 info_outline	PHAGE_Escher_vB_EcoM_ep3_NC_025430(8)	0.6355
											256	5	22.3	intact			120	25	90-22485 info_outline	PHAGE_Burkho_phi1026b_NC_005284(14)	0.6171
											263	6	29.2	questionable			80	40	419-29699 info_outline	PHAGE_Salmon_SEN34_NC_028699(21)	0.647
AU3578			GCA_002981575.1	Sputum	CF	7043739	253	226	60318	66.68	157	1	31.9	incomplete		CF	30	27	3495-35458 info_outline	PHAGE_Burkho_KS5_NC_015265(21)	0.6545	1	0	2	0.0917	7.04374	1.30187
											195	2	29.3	incomplete			50	45	999-30354 info_outline	PHAGE_Aeromo_vB_AsaM_56_NC_019527(12)	0.634
											207	3	30.5	intact			120	44	12181-42685 info_outline	PHAGE_Salmon_SEN34_NC_028699(23)	0.6287
AZ_3_1_30_S1_D7			GCA_001523585.1	Soil	ENV	6594542	68	60	245537	67.3	9	1	31.2	intact		ENV	140	39	232595-263872 info_outline	PHAGE_Burkho_phi1026b_NC_005284(19)	0.6172	3	0	0	0.1043	6.59454	1.58161
											15	2	46.7	intact			110	47	99449-146214 info_outline	PHAGE_Burkho_KS5_NC_015265(34)	0.6518
											24	3	26.4	intact			140	28	175624-202114 info_outline	PHAGE_Escher_vB_EcoM_ep3_NC_025430(7)	0.6329
BAA_248			GCA_001527445.1	Environmental	ENV	6867859	91	78	178930	66.9	18	1	14.7	incomplete		ENV	30	6	6835-21598 info_outline	PHAGE_Bacill_0305phi8_36_NC_009760(1)	0.6777	0	2	3	0.0416	6.86786	0.60572
											28	2	7.5	incomplete			40	6	103656-111233 info_outline	PHAGE_Sulfit_pCB2047_A_NC_020858(3)	0.5325
											36	3	4.9	questionable			70	7	6992-11955 info_outline	PHAGE_Stx2_c_1717_NC_011357(3)	0.6054
											47	4	6.7	questionable			70	9	40577-47314 info_outline	PHAGE_Stx2_c_1717_NC_011357(3)	0.6299
											91	5	7.8	incomplete			10	10	73736-81565 info_outline	PHAGE_Entero_186_NC_001317(1)	0.5899
BBG1222			GCA_900631645.1	Environmental/soil	ENV	6770405	3	3	2221444	67.12	1	1	8.9	incomplete		ENV	10	10	1257225-1266154 info_outline	PHAGE_Mycoba_Enkosi_NC_028936(1)	0.7012	0	0	4	0.0415	6.77041	0.612962
											3	2	18	incomplete			40	7	556442-574481 info_outline	PHAGE_Clostr_c_st_NC_007581(2)	0.6376
											3	3	9	incomplete			10	9	851030-860110 info_outline	PHAGE_Entero_phi92_NC_023693(4)	0.5998
											3	4	5.6	incomplete			50	7	2139402-2145045 info_outline	PHAGE_Entero_fiAA91_ss_NC_022750(2)	0.6022
BCC0027	LMG 18835	ERR1108993		CF	CF	6835509	96	81	178086	66.96	8	1	35.5	incomplete		CF	40	31	123549-159048 info_outline	PHAGE_Klebsi_phiKO2_NC_005857(2)	0.6379	1	0	2	0.0995	6.83551	1.45563
											11	2	47.5	intact			114	51	84318-131890 info_outline	PHAGE_Burkho_BcepC6B_NC_005887(35)	0.6519
											19	3	16.5	incomplete			20	24	106292-122874 info_outline	PHAGE_Entero_mEpX1_NC_019709(2)	0.604
BCC0028	LMG 16232	ERR1108992		CF	CF	6619948	124	103	132217	67.28	7	1	21.2	intact		CF	140	24	168705-189926 info_outline	PHAGE_Escher_vB_EcoM_ep3_NC_025430(7)	0.6368	1	0	2	0.0674	6.61995	1.01813
											39	2	16.7	incomplete			60	17	18010-34760 info_outline	PHAGE_Entero_phi92_NC_023693(4)	0.5804
											46	3	29.5	incomplete			30	32	6864-36374 info_outline	PHAGE_Burkho_Bcep22_NC_005262(4)	0.6317
BCC0029	LMG 18836	ERR1108906		Chronic granulomatous disease; Lung abscess	CLIN	6907955	145	121	117107	66.79	35	1	32.1	questionable		CLIN	90	49	3166-35338 info_outline	PHAGE_Salmon_SEN34_NC_028699(21)	0.646	0	1	0	0.0321	6.90796	0.464682
BCC0030	LMG 10929	ERR1108931		Rice root	ENV	6817241	102	83	175629	66.94	28	1	32.9	incomplete		ENV	20	26	50502-83416 info_outline	PHAGE_Cronob_vB_CsaM_GAP32_NC_019401(1)	0.598	0	0	1	0.0329	6.81724	0.4826
BCC0040	J1712	ERR1108914		Non-CF	CLIN	6236748	73	65	232358	66.7	39	1	7.1	incomplete		CLIN	30	8	1952-9117 info_outline	PHAGE_Prochl_P_SSM3_NC_021559(1)	0.6312	0	0	1	0.0071	6.23675	0.113841
BCC0042	J1702	ERR1100721		Environmental (Hospital)	ENV	6247196	85	73	232358	66.68	42	1	7.1	incomplete		ENV	30	8	1952-9117 info_outline	PHAGE_Prochl_P_SSM3_NC_021559(1)	0.6312	0	0	1	0.0071	6.2472	0.113651
BCC0046	J1738	ERR1108959		Non-CF	CLIN	6738933	74	62	243968	66.99	41	1	7.1	incomplete		CLIN	30	8	7665-14830 info_outline	PHAGE_Prochl_P_SSM3_NC_021559(1)	0.6312	0	0	1	0.0071	6.73893	0.105358
BCC0104	RJ2	ERR1108922		Non-CF; Lymph node	CLIN	7014818	131	110	156835	66.89	3	1	26	incomplete		CLIN	30	34	210104-236185 info_outline	PHAGE_Rhodof_P26218_NC_029061(7)	0.6397	0	1	1	0.0616	7.01482	0.878141
											11	2	35.6	questionable			80	44	22003-57649 info_outline	PHAGE_Escher_TL_2011b_NC_019445(10)	0.6566
BCC0124	CLO	ERR1108945		CF	CF	7071093	90	70	199316	66.95	13	1	49.7	intact		CF	114	51	78823-128607 info_outline	PHAGE_Burkho_BcepC6B_NC_005887(35)	0.6531	1	0	1	0.0568	7.07109	0.80327
											44	2	7.1	incomplete			30	8	1952-9117 info_outline	PHAGE_Prochl_P_SSM3_NC_021559(1)	0.6312
BCC0126	SMH	ERR1821367		CF	CF	6712975	86	71	185785	67.12	5	1	34.7	questionable		CF	90	48	210666-245432 info_outline	PHAGE_Salmon_SEN34_NC_028699(20)	0.6532	1	1	1	0.1124	6.71298	1.67437
											5	2	25.1	incomplete			20	21	245526-270654 info_outline	PHAGE_Burkho_phi1026b_NC_005284(2)	0.6373
											17	3	52.6	intact			150	32	121547-174204 info_outline	PHAGE_Escher_vB_EcoM_ep3_NC_025430(7)	0.6334
BCC0128	MO1	ERR1100729		CF	CF	6591008	86	76	200284	67.2	26	1	12	incomplete		CF	20	11	11703-23792 info_outline	PHAGE_Entero_phi92_NC_023693(4)	0.6189	0	0	2	0.0268	6.59101	0.406615
											46	2	14.8	incomplete			30	7	6674-21490 info_outline	PHAGE_Bacill_0305phi8_36_NC_009760(1)	0.6767
BCC0129	R,K	ERR1821396		CF	CF	6770619	107	96	184737	67.01	4	1	33.3	intact		CF	150	41	10819-44207 info_outline	PHAGE_Burkho_Bcep176_NC_007497(19)	0.6138	1	1	1	0.1146	6.77062	1.69261
											4	2	32.7	questionable			90	44	235895-268633 info_outline	PHAGE_Salmon_SEN34_NC_028699(20)	0.643
											27	3	48.6	incomplete			60	58	58485-107125 info_outline	PHAGE_Rhodof_P26218_NC_029061(6)	0.6413
BCC0136	SAB	ERR1108944		CF	CF	7252206	124	108	181733	66.7	14	1	35.2	intact		CF	103	37	4244-39455 info_outline	PHAGE_Burkho_KL3_NC_015266(36)	0.6396	1	0	0	0.0352	7.25221	0.48537
BCC0142	AU0109	ERR1100737		CF	CF	7154679	136	110	174511	66.78	3	1	34.3	intact		CF	140	51	13495-47842 info_outline	PHAGE_Burkho_Bcep176_NC_007497(20)	0.6146	2	0	1	0.0898	7.15468	1.25512
											8	2	20.4	incomplete			50	26	93-20578 info_outline	PHAGE_Salmon_SEN34_NC_028699(8)	0.6265
											9	3	35.1	intact			150	41	153414-188516 info_outline	PHAGE_Escher_vB_EcoM_ep3_NC_025430(9)	0.6304
BCC0151	FC0353	ERR1100650		CF	CF	6028067	134	122	104369	67.39	44	1	37.4	intact		CF	110	46	13613-51037 info_outline	PHAGE_Burkho_phi1026b_NC_005284(12)	0.6333	1	0	0	0.0374	6.02807	0.620431
BCC0157	PC030	ERR1821480		CF	CF	6302951	95	84	163236	67.22	3	1	9	incomplete		CF	10	9	307554-316634 info_outline	PHAGE_Entero_phi92_NC_023693(4)	0.6005	0	0	1	0.009	6.30295	0.14279
BCC0185	LMG 06999	ERR1821410		Non-CF; Neck abscess	CLIN	7059372	114	99	202710	66.84	12	1	29.4	intact		CLIN	150	34	130784-160259 info_outline	PHAGE_Burkho_phiE12_2_NC_009236(27)	0.6274	2	0	1	0.0846	7.05937	1.19841
											27	2	48.1	intact			150	54	1215-49375 info_outline	PHAGE_Burkho_KS9_NC_013055(34)	0.6322
											55	3	7.1	incomplete			30	8	1952-9117 info_outline	PHAGE_Prochl_P_SSM3_NC_021559(1)	0.6312
BCC0190	P220	ERR1108930		CF	CF	6143786	69	61	229186	66.78	41	1	7.1	incomplete		CF	30	8	1952-9117 info_outline	PHAGE_Prochl_P_SSM3_NC_021559(1)	0.6312	0	0	1	0.0071	6.14379	0.115564
BCC0194	CRE-7	ERR1108990		Soil	ENV	7001366	166	142	127479	66.97	4	1	41	intact	G4P1-variant	ENV	150	47	84947-126007 info_outline	PHAGE_Mannhe_vB_MhM_3927AP2_NC_028766(11)	0.6242	3	1	3	0.1882	7.00137	2.68805
											13	2	34.2	intact	G4P1-like		150	44	13250-47522 info_outline	PHAGE_Mannhe_vB_MhM_3927AP2_NC_028766(12)	0.6279
											13	3	29.1	incomplete			30	41	56180-85372 info_outline	PHAGE_Rhodof_P26218_NC_029061(6)	0.6314
											46	4	36.1	questionable			90	44	14635-50830 info_outline	PHAGE_Salmon_SEN34_NC_028699(20)	0.6199
											58	5	8.2	incomplete			30	9	1-8216 info_outline	PHAGE_Entero_phi92_NC_023693(4)	0.5954
											59	6	31.1	intact	G4P1-variant		150	43	1204-32358 info_outline	PHAGE_Ralsto_RS138_NC_029107(18)	0.6179
											66	7	8.5	incomplete			40	7	18010-26523 info_outline	PHAGE_Bacill_G_NC_023719(1)	0.5657
BCC0324	J1742	ERR1100658		Non-CF	CLIN	6185307	80	70	228941	66.65	41	1	7.1	incomplete		CLIN	30	8	7665-14830 info_outline	PHAGE_Prochl_P_SSM3_NC_021559(1)	0.6312	0	0	1	0.0071	6.18531	0.114788
BCC0581	C8395	ERR1108956		CF	CF	7585736	98	88	240818	66.4	15	1	16.1	incomplete		CF	60	13	155027-171140 info_outline	PHAGE_Entero_BP_4795_NC_004813(3)	0.5788	0	0	2	0.0232	7.58574	0.305837
											51	2	7.1	incomplete			30	8	2008-9173 info_outline	PHAGE_Prochl_P_SSM3_NC_021559(1)	0.6312
BCC0587	ATCC 29424	ERR1821415		Soil	ENV	6999634	153	117	181571	66.82	5	1	34.5	intact		ENV	140	44	208708-243220 info_outline	PHAGE_Burkho_Bcep176_NC_007497(20)	0.614	2	0	0	0.0713	6.99963	1.01862
											18	2	36.8	intact	G4P1-like		150	47	82306-119180 info_outline	PHAGE_Mannhe_vB_MhM_3927AP2_NC_028766(12)	0.6292
BCC1161	CEP1223	ERR1108953		CF	CF	6578290	88	79	181221	67.35	13	1	29.6	questionable		CF	88	38	142480-172103 info_outline	PHAGE_Burkho_KS5_NC_015265(27)	0.6303	0	1	0	0.0296	6.57829	0.449965
BCC1162	CEP1224	ERR1100666		CF	CF	6577372	93	83	158015	67.36	12	1	29.6	questionable		CF	88	38	142480-172103 info_outline	PHAGE_Burkho_KS5_NC_015265(27)	0.6303	0	1	0	0.0296	6.57737	0.450028
BCC1163	CEP1225	ERR1100674		CF	CF	6577683	92	82	172103	67.36	13	1	31.2	questionable		CF	88	39	1-31286 info_outline	PHAGE_Burkho_KS5_NC_015265(27)	0.6262	0	1	0	0.0312	6.57768	0.474331
BCC1170	D0072	ERR1108938		CF	CF	6841400	177	160	99497	66.45	18	1	34.9	intact		CF	104	42	512-35471 info_outline	PHAGE_Burkho_KS5_NC_015265(32)	0.6366	3	0	0	0.118	6.8414	1.72479
											34	2	58.6	intact	G4P1-like		150	49	10809-69411 info_outline	PHAGE_Mannhe_vB_MhM_3927AP2_NC_028766(12)	0.626
											67	3	24.5	intact			120	30	1-24514 info_outline	PHAGE_Burkho_Bcep176_NC_007497(18)	0.6184
BCC1172	D0099	ERR1108946		Environmental	ENV	7328446	176	160	126548	66.35	2	1	34.8	intact		ENV	150	52	55543-90394 info_outline	PHAGE_Burkho_phiE12_2_NC_009236(31)	0.6266	6	0	1	0.2457	7.32845	3.35269
											3	2	37.5	intact			107	42	135537-173101 info_outline	PHAGE_Burkho_KS5_NC_015265(33)	0.6231
											15	3	34.2	intact	G4P1-like		150	45	64331-98603 info_outline	PHAGE_Mannhe_vB_MhM_3927AP2_NC_028766(13)	0.6277
											26	4	37.7	intact			128	46	51341-89097 info_outline	PHAGE_Burkho_KS10_NC_011216(42)	0.6298
											30	5	25.7	intact			150	31	51490-77205 info_outline	PHAGE_Escher_vB_EcoM_ep3_NC_025430(9)	0.6381
											44	6	40.3	incomplete			50	60	12452-52800 info_outline	PHAGE_Rhodof_P26218_NC_029061(7)	0.6368
											51	7	35.5	intact			150	42	2148-37697 info_outline	PHAGE_Salmon_118970_sal3_NC_031940(13)	0.6045
BCC1176	D0774	ERR1108961		CF	CF	7050207	93	86	236999	66.85	16	1	16.1	incomplete		CF	60	13	155027-171140 info_outline	PHAGE_Entero_BP_4795_NC_004813(3)	0.5788	0	0	1	0.0161	7.05021	0.228362
BCC1186	D1389	ERR1100682		CF	CF	7033361	170	156	111825	66.5	20	1	34.9	intact		CF	104	42	514-35473 info_outline	PHAGE_Burkho_KS5_NC_015265(32)	0.6366	3	0	1	0.1334	7.03336	1.89668
											35	2	58.6	intact	G4P1-like		150	50	948-59550 info_outline	PHAGE_Mannhe_vB_MhM_3927AP2_NC_028766(12)	0.626
											69	3	24.5	intact			120	30	1-24514 info_outline	PHAGE_Burkho_Bcep176_NC_007497(18)	0.6184
											86	4	15.4	incomplete			20	28	1432-16844 info_outline	PHAGE_Burkho_phi1026b_NC_005284(8)	0.628
BCC1193	D1476	ERR1108973		CF	CF	7184962	185	166	107022	66.35	2	1	34.8	intact		CF	150	51	197922-232773 info_outline	PHAGE_Burkho_phiE12_2_NC_009236(31)	0.6266	5	0	1	0.1979	7.18496	2.75436
											3	2	37.5	intact			104	40	93219-130783 info_outline	PHAGE_Burkho_KS5_NC_015265(32)	0.6231
											14	3	34.2	intact	G4P1-like		150	45	64331-98603 info_outline	PHAGE_Mannhe_vB_MhM_3927AP2_NC_028766(13)	0.6277
											28	4	25.7	intact			150	31	51490-77205 info_outline	PHAGE_Escher_vB_EcoM_ep3_NC_025430(9)	0.6381
											43	5	38.2	incomplete			50	59	1263-39467 info_outline	PHAGE_Rhodof_P26218_NC_029061(7)	0.6345
											64	6	27.5	intact			140	35	1-27520 info_outline	PHAGE_Salmon_118970_sal3_NC_031940(13)	0.6156
BCC1301	23 (URDPS)	ERR1108980		Environmental (Industrial)	IND	6836493	133	111	149334	66.94	1	1	58	intact		IND	118	59	143725-201746 info_outline	PHAGE_Burkho_KL3_NC_015266(41)	0.6385	2	1	4	0.2073	6.83649	3.03226
											30	2	34.2	intact	G4P1-like		150	45	75659-109924 info_outline	PHAGE_Mannhe_vB_MhM_3927AP2_NC_028766(12)	0.6284
											39	3	23.9	incomplete			30	20	33727-57695 info_outline	PHAGE_Salmon_118970_sal3_NC_031940(2)	0.5922
											41	4	15.5	incomplete			10	27	67-15577 info_outline	PHAGE_Pseudo_YMC11/07/P54_PAE_BP_NC_030909(5)	0.6439
											41	5	29.1	questionable			80	41	18296-47408 info_outline	PHAGE_Salmon_SEN34_NC_028699(21)	0.6418
											46	6	19	incomplete			40	29	665-19717 info_outline	PHAGE_Vibrio_VvAW1_NC_020488(6)	0.5981
											46	7	27.6	incomplete			40	10	10921-38589 info_outline	PHAGE_Burkho_BcepC6B_NC_005887(2)	0.5917
BCC1304	26 (URDPS)	ERR1108905		Environmental (Industrial)	IND	8035225	144	125	153088	66.13	16	1	25.2	incomplete		IND	30	31	3695-28909 info_outline	PHAGE_Pseudo_phi297_NC_016762(4)	0.6328	3	0	3	0.1572	8.03523	1.95639
											21	2	17.6	incomplete			50	25	59763-77371 info_outline	PHAGE_Burkho_phiE125_NC_003309(4)	0.6339
											21	3	33.2	intact			150	46	83150-116360 info_outline	PHAGE_Salmon_118970_sal3_NC_031940(10)	0.6179
											40	4	45.7	intact			117	51	12977-58721 info_outline	PHAGE_Burkho_BcepC6B_NC_005887(36)	0.6538
											50	5	21.8	intact			150	28	19123-40984 info_outline	PHAGE_Escher_vB_EcoM_ep3_NC_025430(8)	0.6385
											64	6	13.7	incomplete			50	24	2-13800 info_outline	PHAGE_Salmon_SEN34_NC_028699(8)	0.6127
BCC1309	31 (URDPS)	ERR1108978		Environmental (Industrial)	IND	7030937	106	92	176844	66.94	3	1	45.1	intact		IND	110	53	258476-303641 info_outline	PHAGE_Salmon_SEN34_NC_028699(23)	0.625	3	0	2	0.154	7.03094	2.19032
											5	2	42.3	intact			150	49	50606-92906 info_outline	PHAGE_Escher_vB_EcoM_ep3_NC_025430(8)	0.6157
											5	3	36.9	intact	G4P1-like		150	52	204760-241708 info_outline	PHAGE_Ralsto_RS138_NC_029107(13)	0.6234
											45	4	22.6	incomplete			50	27	10934-33533 info_outline	PHAGE_Burkho_phiE125_NC_003309(4)	0.5833
											55	5	7.1	incomplete			30	8	7666-14831 info_outline	PHAGE_Prochl_P_SSM3_NC_021559(1)	0.6312
BCC1409	JW13.2a	ERR1108927		Diesel contaminant	IND	7184515	88	79	301076	66.69	17	1	28.5	intact		IND	150	32	8897-37402 info_outline	PHAGE_Escher_vB_EcoM_ep3_NC_025430(8)	0.6327	1	0	0	0.0285	7.18452	0.396686
BCC1412	JW14.1a	ERR1108935		Diesel contaminant	IND	7268740	163	136	154124	66.67	7	1	35.3	intact	G4P1-like	IND	150	46	3491-38887 info_outline	PHAGE_Mannhe_vB_MhM_3927AP2_NC_028766(13)	0.6242	4	0	2	0.1673	7.26874	2.30164
											12	2	38.4	intact			110	37	138197-176626 info_outline	PHAGE_Ralsto_RSB1_NC_011201(19)	0.6244
											21	3	12.1	incomplete			30	13	15774-27892 info_outline	PHAGE_Ralsto_RSS0_NC_019548(3)	0.5726
											46	4	34	intact			150	47	262-34301 info_outline	PHAGE_Burkho_phi6442_NC_009235(14)	0.5966
											47	5	28.5	intact			100	40	8295-36815 info_outline	PHAGE_Salmon_SEN34_NC_028699(22)	0.6232
											65	6	19	incomplete			30	20	1-19076 info_outline	PHAGE_Burkho_BcepC6B_NC_005887(16)	0.6566
BE10			GCA_003849655.1	Rhizosphere	ENV	6803795	122	114	115684	67.15	94	1	25.2	intact		ENV	150	29	90229-115525 info_outline	PHAGE_Escher_vB_EcoM_ep3_NC_025430(8)	0.64	1	0	0	0.0252	6.8038	0.370382
CBMB40			GCA_000980955.1	Rice	ENV	7082565	165	148	97666	66.89	100	1	28.2	intact		ENV	150	30	137232-165488 info_outline	PHAGE_Escher_vB_EcoM_ep3_NC_025430(6)	0.635	1	0	0	0.0282	7.08256	0.398161
FDAARGOS_239			GCA_003019945.1	Oryza sativa, rhizosphere soil	ENV	6930411	4	4	2262065	66.83	1	1	8.2	incomplete		ENV	40	9	3107452-3115736 info_outline	PHAGE_Entero_fiAA91_ss_NC_022750(2)	0.6098	0	2	2	0.0394	6.93041	0.568509
											3	2	13.8	questionable			70	11	518846-532682 info_outline	PHAGE_Bacter_Diva_NC_028788(2)	0.6397
											3	3	9.6	questionable			90	11	1135051-1144650 info_outline	PHAGE_Stx2_c_1717_NC_011357(4)	0.6156
											4	4	7.8	incomplete			10	10	83484-91313 info_outline	PHAGE_Entero_186_NC_001317(1)	0.5899
FL_1_2_10_S1_D0			GCA_001523615.1	Soil	ENV	6717763	107	94	118150	67.35	76	1	45.3	intact		ENV	150	40	60918-106273 info_outline	PHAGE_Burkho_KS9_NC_013055(38)	0.6126	3	0	0	0.1236	6.71776	1.8399
											99	2	34.3	intact			150	39	95642-130031 info_outline	PHAGE_Escher_vB_EcoM_ep3_NC_025430(7)	0.6295
											107	3	44	intact			150	63	52988-97011 info_outline	PHAGE_Burkho_phi1026b_NC_005284(19)	0.6186
FL_2_1_10_S1_D0			GCA_001525685.1	Soil	ENV	6715243	99	92	185071	67.22	37	1	21.7	intact		ENV	150	28	1438-23236 info_outline	PHAGE_Escher_vB_EcoM_ep3_NC_025430(8)	0.6381	1	1	0	0.0546	6.71524	0.813076
											43	2	32.9	questionable			75	33	93650-126638 info_outline	PHAGE_Burkho_KS5_NC_015265(23)	0.64
FL_2_2_10_S1_D0			GCA_001523755.1	Soil	ENV	6730926	129	119	109066	67.31	6	1	21.2	intact		ENV	150	27	19237-40477 info_outline	PHAGE_Escher_vB_EcoM_ep3_NC_025430(8)	0.6413	1	0	0	0.0212	6.73093	0.314964
FL_2_2_30_S1_D0			GCA_001523785.1	Soil	ENV	6809400	77	68	206921	67.27	57	1	36.8	intact		ENV	107	48	92672-129508 info_outline	PHAGE_Burkho_KS5_NC_015265(33)	0.6404	1	0	0	0.0368	6.8094	0.540429
FL_2_3_10_S1_D7			GCA_001525665.1	Soil	ENV	6708517	51	42	246297	67.36	19	1	39.3	intact		ENV	150	43	192653-232036 info_outline	PHAGE_Burkho_KS9_NC_013055(13)	0.5962	3	0	0	0.092	6.70852	1.37139
											20	2	21.7	intact			150	25	19276-40998 info_outline	PHAGE_Escher_vB_EcoM_ep3_NC_025430(7)	0.6411
											49	3	31	intact			140	40	31642-62701 info_outline	PHAGE_Burkho_Bcep176_NC_007497(18)	0.617
FL_2_3_10_S3_D0			GCA_001523705.1	Soil	ENV	6693522	64	56	220842	67.36	17	1	31.5	intact		ENV	150	39	1959-33476 info_outline	PHAGE_Burkho_phiE12_2_NC_009236(28)	0.6163	3	0	0	0.1053	6.69352	1.57316
											27	2	52.6	intact			104	50	95529-148154 info_outline	PHAGE_Burkho_KS5_NC_015265(32)	0.6478
											41	3	21.2	intact			150	26	149207-170448 info_outline	PHAGE_Escher_vB_EcoM_ep3_NC_025430(7)	0.6404
FL_2_3_30_S1_D0			GCA_001718495.1	Soil	ENV	6815283	3	3	2428798	67.23	1	1	36.9	intact	G4P1-variant	ENV	140	45	1267576-1304503 info_outline	PHAGE_Haemop_SuMu_NC_019455(14)	0.6262	2	0	1	0.1211	6.81528	1.77689
											1	2	45.8	incomplete			40	23	1886348-1932245 info_outline	PHAGE_Stenot_S1_NC_011589(2)	0.6088
											2	3	38.4	intact			150	36	1629017-1667449 info_outline	PHAGE_Burkho_KS9_NC_013055(12)	0.587
FL_2_4_30_S1_D0			GCA_001525645.1	Soil	ENV	6949322	88	73	188459	67.24	38	1	44.7	intact		ENV	104	51	96690-141446 info_outline	PHAGE_Burkho_BcepC6B_NC_005887(32)	0.6594	2	0	0	0.0659	6.94932	0.948294
											68	2	21.2	intact			150	26	147909-169150 info_outline	PHAGE_Escher_vB_EcoM_ep3_NC_025430(7)	0.6404
FL_2_5_10_S1_D0			GCA_001523945.1	Soil	ENV	6543164	68	58	208888	67.25	6	1	41.3	intact		ENV	100	49	260739-302059 info_outline	PHAGE_Burkho_BcepC6B_NC_005887(15)	0.6425	2	0	0	0.0698	6.54316	1.06676
											67	2	28.5	intact			150	30	20078-48582 info_outline	PHAGE_Escher_vB_EcoM_ep3_NC_025430(7)	0.6329
FL_2_5_30_S1_D0			GCA_001523965.1	Soil	ENV	6823232	77	65	255048	67.1	38	1	42.6	intact		ENV	150	57	21375-63981 info_outline	PHAGE_Burkho_phiE125_NC_003309(20)	0.613	2	0	0	0.097	6.82323	1.42161
											61	2	54.4	intact			150	43	188302-242756 info_outline	PHAGE_Escher_vB_EcoM_ep3_NC_025430(9)	0.6266
FL_5_1_10_S1_D0			GCA_001524005.1	Soil	ENV	6865035	88	75	234460	67.27	16	1	37.5	intact		ENV	150	44	155466-192998 info_outline	PHAGE_Burkho_KS9_NC_013055(13)	0.5982	1	0	0	0.0375	6.86503	0.546246
FL_5_2_10_S1_D0			GCA_001524025.1	Soil	ENV	6712461	77	68	201222	67.18	39	1	15.6	intact		ENV	110	19	151-15839 info_outline	PHAGE_Salmon_118970_sal3_NC_031940(9)	0.6206	1	0	1	0.0392	6.71246	0.583988
											63	2	23.6	incomplete			60	33	20642-44273 info_outline	PHAGE_Burkho_phi6442_NC_009235(15)	0.5825
FL_5_2_10_S1_D0_repeat			GCA_001524045.1	Soil	ENV	6826472	117	97	178352	66.99	28	1	21.1	incomplete		ENV	60	24	8752-29855 info_outline	PHAGE_Salmon_118970_sal3_NC_031940(2)	0.6049	2	0	4	0.1206	6.82647	1.76665
											36	2	21.2	intact			140	24	27083-48313 info_outline	PHAGE_Escher_vB_EcoM_ep3_NC_025430(7)	0.636
											48	3	27.4	incomplete			40	35	253798-281224 info_outline	PHAGE_Rhodof_P26218_NC_029061(7)	0.6471
											55	4	34.2	intact	G4P1-like		150	45	49923-84180 info_outline	PHAGE_Mannhe_vB_MhM_3927AP2_NC_028766(12)	0.6283
											72	5	8.2	incomplete			30	9	66-8293 info_outline	PHAGE_Entero_phi92_NC_023693(4)	0.5954
											91	6	8.5	incomplete			40	7	18087-26612 info_outline	PHAGE_Bacill_G_NC_023719(1)	0.5654
FL_5_2_10_S2_D0			GCA_001524065.1	Soil	ENV	6710020	98	80	192220	67.18	66	1	24.2	intact		ENV	150	30	36052-60272 info_outline	PHAGE_Salmon_118970_sal3_NC_031940(12)	0.6157	1	0	0	0.0242	6.71002	0.360655
FL_7_1_10_S1_D0			GCA_001524145.1	Soil	ENV	6947154	101	82	188711	66.97	42	1	20.8	intact		ENV	150	26	19236-40089 info_outline	PHAGE_Escher_vB_EcoM_ep3_NC_025430(8)	0.6398	1	0	1	0.0343	6.94715	0.493727
											43	2	13.5	incomplete			30	11	103120-116710 info_outline	PHAGE_Ralsto_p12J_NC_005131(3)	0.5661
FL_7_2_10_S2_D0			GCA_001524205.1	Soil	ENV	6520894	84	69	201435	67.33	16	1	39.4	intact		ENV	150	42	10831-50315 info_outline	PHAGE_Burkho_KS9_NC_013055(12)	0.5947	2	0	0	0.0687	6.52089	1.05354
											84	2	29.3	intact			150	34	159732-189120 info_outline	PHAGE_Escher_vB_EcoM_ep3_NC_025430(7)	0.6316
FL_7_3_30_S2_D0			GCA_001524225.1	Soil	ENV	6521874	91	74	201435	67.33	25	1	39.4	intact		ENV	150	42	8499-47983 info_outline	PHAGE_Burkho_KS9_NC_013055(12)	0.5947	2	0	0	0.0824	6.52187	1.26344
											38	2	43	intact			150	50	2027-45059 info_outline	PHAGE_Escher_vB_EcoM_ECO1230_10_NC_027995(7)	0.6111
FL_7_4_10_S1_D0			GCA_001524235.1	Soil	ENV	6520988	88	73	201338	67.33	70	1	39.4	intact		ENV	150	42	8962-48446 info_outline	PHAGE_Burkho_KS9_NC_013055(12)	0.5947	2	0	0	0.0687	6.52099	1.05352
											84	2	29.3	intact			150	34	159951-189339 info_outline	PHAGE_Escher_vB_EcoM_ep3_NC_025430(7)	0.6316
FL_7_4_30_S2_D0			GCA_001524265.1	Soil	ENV	6869375	94	81	187869	67.07	38	1	21.8	intact		ENV	150	27	17759-39601 info_outline	PHAGE_Escher_vB_EcoM_ep3_NC_025430(7)	0.6388	4	0	0	0.1354	6.86937	1.97107
											58	2	35.5	intact			150	47	2072-37604 info_outline	PHAGE_Burkho_phi6442_NC_009235(14)	0.5981
											68	3	28.3	intact			140	35	96-28460 info_outline	PHAGE_Burkho_phi1026b_NC_005284(17)	0.6164
											81	4	49.8	intact			114	49	64405-114294 info_outline	PHAGE_Burkho_BcepC6B_NC_005887(35)	0.6564
FL_7_4_30_S3_D0			GCA_001524285.1	Soil	ENV	6521115	81	70	200870	67.33	39	1	39.4	intact		ENV	150	36	151036-190520 info_outline	PHAGE_Burkho_KS9_NC_013055(11)	0.5947	2	0	0	0.0687	6.52111	1.0535
											53	2	29.3	intact			150	34	161557-190945 info_outline	PHAGE_Escher_vB_EcoM_ep3_NC_025430(7)	0.6316
FL_7_5_30_S2_D0			GCA_001524305.1	Soil	ENV	6648683	81	68	205278	67.48	5	1	39.4	questionable		ENV	90	61	127710-167112 info_outline	PHAGE_Salmon_SEN34_NC_028699(21)	0.6427	1	1	0	0.0752	6.64868	1.13105
											57	2	35.8	intact			110	40	139378-175188 info_outline	PHAGE_Burkho_KS5_NC_015265(34)	0.6346
G4			GCA_000016205.1	Wastewater	ENV	8391070	8	8	2411759	65.74	1	1	18.8	incomplete		ENV	10	30	19748-38577 info_outline	PHAGE_Pseudo_F116_NC_006552(3)	0.6119	2	2	8	0.2758	8.39107	3.28683
											1	2	14.7	incomplete			30	18	42171-56871 info_outline	PHAGE_Salmon_SJ46_NC_031129(4)	0.619
											1	3	13.4	incomplete			40	19	74623-88095 info_outline	PHAGE_Burkho_ST79_NC_021343(3)	0.615
											2	4	23.1	questionable			90	25	149287-172468 info_outline	PHAGE_Entero_fiAA91_ss_NC_022750(2)	0.6215
											7	5	17.7	incomplete			40	25	1338573-1356318 info_outline	PHAGE_Pseudo_PMG1_NC_016765(2)	0.6146
											7	6	30.7	questionable			80	37	1357870-1388635 info_outline	PHAGE_Salmon_SEN34_NC_028699(20)	0.6299
											8	7	28	intact			120	15	209082-237148 info_outline	PHAGE_Burkho_phi52237_NC_007145(4)	0.6285
											8	8	39.9	incomplete			50	28	1249570-1289548 info_outline	PHAGE_Rhodof_P26218_NC_029061(3)	0.606
											8	9	35.2	incomplete			50	10	1267651-1302852 info_outline	PHAGE_Bacill_GA_1_NC_002649(1)	0.5966
											8	10	34.2	intact	G4P1		150	46	1387077-1421328 info_outline	PHAGE_Mannhe_vB_MhM_3927AP2_NC_028766(13)	0.6278
											8	11	7.4	incomplete			30	7	2733054-2740522 info_outline	PHAGE_Salmon_118970_sal3_NC_031940(2)	0.5942
											8	12	12.7	incomplete			40	14	3593838-3606633 info_outline	PHAGE_Stx2_c_1717_NC_011357(2)	0.6311
HI2221			GCA_001528585.1	Oryza sativa, rhizosphere soil	ENV	6861005	99	89	175819	66.9	33	1	29.4	incomplete		ENV	10	27	3469-32868 info_outline	PHAGE_Cronob_vB_CsaM_GAP32_NC_019401(1)	0.6048	0	0	1	0.0294	6.861	0.428509
HI2297			GCA_001718815.1	Oryza sativa root	ENV	6764532	3	3	2215292	67.06	1	1	29.7	intact		ENV	120	37	1614389-1644121 info_outline	PHAGE_Burkho_Bcep176_NC_007497(18)	0.6182	1	0	0	0.0297	6.76453	0.439055
HI3392			GCA_001529645.1	Hospital-Room 1036, Sink	ENV	7618768	196	173	97704	66.4	56	1	46	intact		ENV	129	55	3215-49222 info_outline	PHAGE_Burkho_KS14_NC_015273(38)	0.6272	4	1	0	0.2003	7.61877	2.62903
											93	2	35.7	intact	G4P1-like		150	46	27662-63376 info_outline	PHAGE_Mannhe_vB_MhM_3927AP2_NC_028766(13)	0.6298
											119	3	25.7	intact			150	31	1851-27566 info_outline	PHAGE_Escher_vB_EcoM_ep3_NC_025430(9)	0.6381
											135	4	55.4	questionable			80	66	8473-63948 info_outline	PHAGE_Aeromo_vB_AsaM_56_NC_019527(12)	0.6318
											140	5	37.5	intact			107	42	97791-135355 info_outline	PHAGE_Burkho_KS5_NC_015265(33)	0.6231
HI3908			GCA_001530215.1	Hospital equipment	ENV	6267375	94	87	191929	66.66	84	1	7.1	incomplete		ENV	30	8	2029-9194 info_outline	PHAGE_Prochl_P_SSM3_NC_021559(1)	0.6312	0	0	1	0.0071	6.26738	0.113285
LA_5_5_30_S1_D2			GCA_001523535.1	Soil	ENV	7058922	147	137	114163	66.96	109	1	38.4	intact	G4P1-like	ENV	150	51	2870-41341 info_outline	PHAGE_Ralsto_RS138_NC_029107(13)	0.6256	1	0	1	0.0686	7.05892	0.97182
											135	2	30.2	incomplete			60	34	829-31029 info_outline	PHAGE_Pseudo_vB_PaeP_Tr60_Ab31_NC_023575(3)	0.6407
LA_6_3_30_S1_D2			GCA_001522565.1	Soil	ENV	6659961	119	107	113364	67.43	58	1	66.6	intact		ENV	150	79	10861-77547 info_outline	PHAGE_Burkho_phi1026b_NC_005284(24)	0.6283	1	0	0	0.0666	6.65996	1.00001
LMG_10929			GCA_000959445.1	Oryza sativa, rhizosphere soil	ENV	6930496	4	4	2262093	66.83	1	1	8.2	incomplete		ENV	40	9	2697178-2705462 info_outline	PHAGE_Entero_fiAA91_ss_NC_022750(2)	0.6098	0	1	3	0.0394	6.9305	0.568502
											3	2	13.8	incomplete			50	10	24464-38301 info_outline	PHAGE_Bacill_0305phi8_36_NC_009760(1)	0.6397
											3	3	9.6	questionable			90	11	640670-650269 info_outline	PHAGE_Stx2_c_1717_NC_011357(4)	0.6156
											4	4	7.8	incomplete			10	10	5812-13641 info_outline	PHAGE_Entero_186_NC_001317(1)	0.5899
MSMB608WGS			GCA_001718915.1	Plant roots	ENV	6891714	4	4	2229737	67	1	1	92.9	intact		ENV	150	105	1546746-1639662 info_outline	PHAGE_Salmon_SEN34_NC_028699(20)	0.6376	1	1	0	0.1023	6.89171	1.48439
											2	2	9.4	questionable			70	11	828864-838331 info_outline	PHAGE_Entero_BP_4795_NC_004813(3)	0.5932
PC082			GCA_001541005.1	Soil with phthalate enrichment	ENV	7307902	155	128	176200	66.8	20	1	36.8	intact	G4P1-like	ENV	150	50	16502-53376 info_outline	PHAGE_Ralsto_RS138_NC_029107(13)	0.6292	2	0	0	0.0713	7.3079	0.975656
											89	2	34.5	intact			140	44	208784-243296 info_outline	PHAGE_Burkho_Bcep176_NC_007497(20)	0.614
RS1			GCA_003203575.1	Tuberous root of sweet potato	ENV	6541592	74	68	167847	67.61	5	1	44.4	questionable		ENV	90	50	144682-189145 info_outline	PHAGE_Burkho_Bcep176_NC_007497(18)	0.6018	1	1	0	0.0657	6.54159	1.00434
											19	2	21.3	intact			140	27	62931-84237 info_outline	PHAGE_Escher_vB_EcoM_ep3_NC_025430(8)	0.6432
WPB			GCA_900102765.1	Environmental, Populus root	ENV	6758425	42	42	290659	67.03	15	1	30.8	intact		ENV	140	40	34211-65069 info_outline	PHAGE_Burkho_Bcep176_NC_007497(20)	0.62	3	0	0	0.1114	6.75842	1.64831
											18	2	36.6	intact	G4P1-variant		140	45	257495-294122 info_outline	PHAGE_Mannhe_vB_MhM_3927AP2_NC_028766(14)	0.6296
											38	3	44	intact			150	33	3951-48047 info_outline	PHAGE_Escher_vB_EcoM_ep3_NC_025430(7)	0.6184
